# Supplementary material
Source: PubMed Central journal article supplement (PMC4018873)
Supplement: CVI.00051-14_zcd999094963so1.pdf [file CVI.00051-14_zcd999094963so1.pdf]

Supplemental Table 1: ELISA Titers and Neutralization Capabilities of Individual Mouse Sera

| <i>HlaH35L Dose</i> ( $\mu\text{g}$ ) | <i>Mouse</i> | <i>CFU</i>         | <i>ELISA</i> ( $ED_{50}$ ) | <i>Neutralization</i> |
|---------------------------------------|--------------|--------------------|----------------------------|-----------------------|
| 0.0195                                | 1            | $4.50 \times 10^7$ | 40.37                      | Non-neutralizing      |
|                                       | 2            | $4.25 \times 10^7$ | 180.1                      | Non-neutralizing      |
|                                       | 3            | $6.25 \times 10^6$ | 35.31                      | Non-neutralizing      |
|                                       | 4            | $1.75 \times 10^7$ | 155.7                      | Non-neutralizing      |
|                                       | 5            | $3.25 \times 10^7$ | 127                        | Non-neutralizing      |
|                                       | 6            | $6.00 \times 10^7$ | 51.78                      | Non-neutralizing      |
|                                       | 7            | $2.75 \times 10^7$ | 34.28                      | Non-neutralizing      |
|                                       | 8            | $8.00 \times 10^7$ | 55.67                      | Non-neutralizing      |
|                                       | 9            | $4.75 \times 10^7$ | 102.7                      | Non-neutralizing      |
|                                       | 10           | $1.20 \times 10^7$ | 65.21                      | Non-neutralizing      |
| 0.078                                 | 1            | $1.48 \times 10^4$ | 1994                       | Non-neutralizing      |
|                                       | 2            | $5.00 \times 10^3$ | 442.7                      | Non-neutralizing      |
|                                       | 3            | $3.00 \times 10^7$ | 275.3                      | Non-neutralizing      |
|                                       | 4            | $3.50 \times 10^4$ | 632.7                      | Non-neutralizing      |
|                                       | 5            | $1.18 \times 10^7$ | 206.1                      | Non-neutralizing      |
|                                       | 6            | $6.50 \times 10^7$ | 26.74                      | Non-neutralizing      |
|                                       | 7            | $1.75 \times 10^5$ | 430.8                      | Non-neutralizing      |
|                                       | 8            | $9.50 \times 10^7$ | 48.89                      | Non-neutralizing      |
|                                       | 9            | $1.75 \times 10^4$ | 326.8                      | Non-neutralizing      |
|                                       | 10           | $1.25 \times 10^8$ | 32.10                      | Non-neutralizing      |
| 0.031                                 | 1            | $3.5 \times 10^4$  | 895.2                      | Non-neutralizing      |
|                                       | 2            | $1.23 \times 10^7$ | 680.6                      | Non-neutralizing      |

---

|      |    |                    |       |                        |
|------|----|--------------------|-------|------------------------|
|      | 3  | $2.25 \times 10^4$ | 5995  | Partially neutralizing |
|      | 4  | $1.33 \times 10^6$ | 1261  | Non-neutralizing       |
|      | 5  | $9.25 \times 10^5$ | 2803  | Non-neutralizing       |
|      | 6  | $4.25 \times 10^4$ | 1294  | Non-neutralizing       |
|      | 7  | $4.75 \times 10^3$ | 5489  | Non-neutralizing       |
|      | 8  | $1.25 \times 10^8$ | 1144  | Non-neutralizing       |
|      | 9  | $6.50 \times 10^3$ | 4451  | Fully neutralizing     |
|      | 10 | $9.50 \times 10^3$ | 5429  | Partially neutralizing |
| 1.25 | 1  | $2.50 \times 10^4$ | 3676  | Non-neutralizing       |
|      | 2  | $1.50 \times 10^4$ | 4893  | Partially neutralizing |
|      | 3  | $3.25 \times 10^5$ | 10949 | Fully neutralizing     |
|      | 4  | $1.03 \times 10^4$ | 10289 | Fully neutralizing     |
|      | 5  | $3.50 \times 10^3$ | 6569  | Fully neutralizing     |
|      | 6  | $5.00 \times 10^4$ | 8336  | Fully neutralizing     |
|      | 7  | $2.50 \times 10^3$ | 4108  | Partially neutralizing |
|      | 8  | $1.25 \times 10^4$ | 6188  | Fully neutralizing     |
|      | 9  | $2.75 \times 10^4$ | 4397  | Non-neutralizing       |
|      | 10 | $3.00 \times 10^6$ | 12736 | Fully neutralizing     |
| 5    | 1  | $1.48 \times 10^6$ | 4825  | Partially neutralizing |
|      | 2  | $9.00 \times 10^5$ | 7769  | Partially neutralizing |
|      | 3  | $6.75 \times 10^4$ | 3554  | Non-neutralizing       |
|      | 4  | $9.00 \times 10^3$ | 7631  | Non-neutralizing       |
|      | 5  | $1.50 \times 10^4$ | 8270  | Fully neutralizing     |
|      | 6  | $1.18 \times 10^5$ | 8008  | Fully neutralizing     |

---

---

|    |    |                    |       |                    |
|----|----|--------------------|-------|--------------------|
|    | 7  | $4.00 \times 10^4$ | 6850  | Fully neutralizing |
|    | 8  | $4.75 \times 10^4$ | 3309  | Non-neutralizing   |
|    | 9  | $4.50 \times 10^4$ | 2720  | Fully neutralizing |
|    | 10 | $5.25 \times 10^3$ | 6624  | Fully neutralizing |
| 20 | 1  | $3.50 \times 10^3$ | 9075  | Fully neutralizing |
|    | 2  | $1.33 \times 10^4$ | 2969  | Non-neutralizing   |
|    | 3  | $4.25 \times 10^4$ | 13942 | Fully neutralizing |
|    | 4  | $7.25 \times 10^4$ | 7877  | Non-neutralizing   |
|    | 5  | $1.25 \times 10^3$ | 11771 | Fully neutralizing |
|    | 6  | $1.23 \times 10^4$ | 9487  | Fully neutralizing |
|    | 7  | $1.40 \times 10^4$ | 3856  | Non-neutralizing   |
|    | 8  | $1.00 \times 10^4$ | 5366  | Fully neutralizing |
|    | 9  | $2.50 \times 10^5$ | 4518  | Non-neutralizing   |
|    | 10 | $4.75 \times 10^3$ | 7047  | Fully neutralizing |

---
